# Supplementary material for: Changes in total and segmental bioelectrical resistance are correlated with whole-body and segmental changes in lean soft tissue following a resistance training intervention
Source: PubMed Central journal article supplement (PMC6883592; doi:10.1186/s12970-019-0325-4), 2019-11-29
Supplement: 12970_2019_325_MOESM2_ESM.pdf [file 12970_2019_325_MOESM2_ESM.pdf]

**Supplemental Table 2.** Pearson correlations between changes in bioelectrical resistance and changes in dual-energy x-ray absorptiometry body composition.1

|       |          |          | 1 kHz   | 1.5 kHz | 2 kHz   | 3 kHz   | 5 kHz   | 7.5 kHz | 10 kHz  | 15 kHz  | 20 kHz  | 30 kHz  | 50 kHz  | 75 kHz  | 100 kHz | 150 kHz | 200 kHz | 300 kHz | 500 kHz | 750 kHz | 1000 kHz |         |         |
|-------|----------|----------|---------|---------|---------|---------|---------|---------|---------|---------|---------|---------|---------|---------|---------|---------|---------|---------|---------|---------|----------|---------|---------|
| Δ ST  | Total    | <i>r</i> | -0.54   | -0.54   | -0.54   | -0.55   | -0.55   | -0.55   | -0.56   | -0.56   | -0.56   | -0.56   | -0.56   | -0.55   | -0.55   | -0.55   | -0.55   | -0.54   | -0.54   | -0.54   | -0.54    | -0.54   |         |
|       |          | <i>p</i> | 0.002   | 0.002   | 0.002   | 0.001   | 0.001   | 0.001   | 0.001   | 0.001   | 0.001   | 0.001   | 0.001   | 0.001   | 0.001   | 0.001   | 0.001   | 0.001   | 0.002   | 0.002   | 0.002    | 0.002   | 0.002   |
|       | Trunk    | <i>r</i> | -0.61   | -0.60   | -0.60   | -0.59   | -0.61   | -0.61   | -0.58   | -0.59   | -0.60   | -0.61   | -0.62   | -0.63   | -0.63   | -0.63   | -0.63   | -0.63   | -0.62   | -0.60   | -0.56    | -0.50   | -0.50   |
|       |          | <i>p</i> | 0.0002  | 0.0003  | 0.0004  | 0.0004  | 0.0003  | 0.0002  | 0.0007  | 0.0005  | 0.0003  | 0.0003  | 0.0002  | 0.0002  | 0.0002  | 0.0001  | 0.0002  | 0.0002  | 0.0002  | 0.0003  | 0.0012   | 0.0012  | 0.0046  |
|       | Legs     | <i>r</i> | -0.35   | -0.35   | -0.35   | -0.36   | -0.36   | -0.36   | -0.37   | -0.38   | -0.38   | -0.38   | -0.38   | -0.38   | -0.38   | -0.38   | -0.38   | -0.38   | -0.37   | -0.37   | -0.37    | -0.37   | -0.37   |
|       |          | <i>p</i> | 0.05    | 0.05    | 0.05    | 0.05    | 0.05    | 0.04    | 0.04    | 0.04    | 0.04    | 0.03    | 0.03    | 0.03    | 0.03    | 0.04    | 0.04    | 0.04    | 0.04    | 0.04    | 0.04     | 0.04    | 0.04    |
| Arms  | <i>r</i> | -0.59    | -0.59   | -0.59   | -0.59   | -0.59   | -0.59   | -0.59   | -0.60   | -0.60   | -0.60   | -0.60   | -0.60   | -0.60   | -0.60   | -0.60   | -0.61   | -0.61   | -0.61   | -0.60   | -0.60    | -0.60   |         |
|       | <i>p</i> | 0.0005   | 0.0005  | 0.0005  | 0.0005  | 0.0005  | 0.0005  | 0.0004  | 0.0004  | 0.0004  | 0.0004  | 0.0004  | 0.0004  | 0.0004  | 0.0003  | 0.0003  | 0.0003  | 0.0003  | 0.0003  | 0.0003  | 0.0003   | 0.0003  |         |
| Δ LST | Total    | <i>r</i> | -0.63   | -0.63   | -0.64   | -0.64   | -0.65   | -0.66   | -0.66   | -0.67   | -0.68   | -0.69   | -0.69   | -0.69   | -0.69   | -0.69   | -0.69   | -0.69   | -0.69   | -0.69   | -0.69    | -0.69   | -0.69   |
|       |          | <i>p</i> | 0.0001  | 0.0001  | 0.0001  | 0.0001  | 0.0001  | 0.0001  | 0.0001  | <0.0001 | <0.0001 | <0.0001 | <0.0001 | <0.0001 | <0.0001 | <0.0001 | <0.0001 | <0.0001 | <0.0001 | <0.0001 | <0.0001  | <0.0001 | <0.0001 |
|       | Trunk    | <i>r</i> | -0.73   | -0.70   | -0.72   | -0.75   | -0.77   | -0.80   | -0.81   | -0.82   | -0.83   | -0.83   | -0.83   | -0.83   | -0.82   | -0.82   | -0.81   | -0.80   | -0.78   | -0.77   | -0.73    | -0.67   | -0.67   |
|       |          | <i>p</i> | <0.0001 | <0.0001 | <0.0001 | <0.0001 | <0.0001 | <0.0001 | <0.0001 | <0.0001 | <0.0001 | <0.0001 | <0.0001 | <0.0001 | <0.0001 | <0.0001 | <0.0001 | <0.0001 | <0.0001 | <0.0001 | <0.0001  | <0.0001 | <0.0001 |
|       | Legs     | <i>r</i> | -0.38   | -0.38   | -0.39   | -0.39   | -0.39   | -0.40   | -0.41   | -0.42   | -0.42   | -0.43   | -0.44   | -0.44   | -0.44   | -0.44   | -0.44   | -0.44   | -0.44   | -0.44   | -0.44    | -0.44   | -0.44   |
|       |          | <i>p</i> | 0.04    | 0.03    | 0.03    | 0.03    | 0.03    | 0.03    | 0.02    | 0.02    | 0.02    | 0.02    | 0.01    | 0.01    | 0.01    | 0.01    | 0.01    | 0.01    | 0.01    | 0.01    | 0.01     | 0.01    | 0.01    |
| Arms  | <i>r</i> | -0.65    | -0.65   | -0.64   | -0.65   | -0.65   | -0.66   | -0.66   | -0.67   | -0.67   | -0.68   | -0.68   | -0.68   | -0.68   | -0.69   | -0.69   | -0.69   | -0.70   | -0.70   | -0.70   | -0.70    | -0.70   |         |
|       | <i>p</i> | 0.0001   | 0.0001  | 0.0001  | 0.0001  | 0.0001  | 0.0001  | 0.0001  | <0.0001 | <0.0001 | <0.0001 | <0.0001 | <0.0001 | <0.0001 | <0.0001 | <0.0001 | <0.0001 | <0.0001 | <0.0001 | <0.0001 | <0.0001  | <0.0001 |         |
| Δ FM  | Total    | <i>r</i> | -0.08   | -0.07   | -0.07   | -0.07   | -0.07   | -0.07   | -0.06   | -0.06   | -0.05   | -0.04   | -0.04   | -0.04   | -0.03   | -0.03   | -0.02   | -0.02   | -0.02   | -0.01   | -0.01    | -0.01   | -0.01   |
|       |          | <i>p</i> | 0.68    | 0.69    | 0.71    | 0.70    | 0.71    | 0.73    | 0.71    | 0.74    | 0.77    | 0.80    | 0.83    | 0.85    | 0.86    | 0.89    | 0.90    | 0.91    | 0.93    | 0.95    | 0.95     | 0.97    | 0.97    |
|       | Trunk    | <i>r</i> | -0.05   | -0.06   | -0.04   | -0.01   | -0.01   | -0.01   | 0.03    | 0.02    | 0.00    | -0.02   | -0.04   | -0.05   | -0.06   | -0.06   | -0.06   | -0.06   | -0.06   | -0.06   | -0.05    | -0.03   | -0.03   |
|       |          | <i>p</i> | 0.79    | 0.75    | 0.83    | 0.94    | 0.97    | 0.97    | 0.89    | 0.93    | 0.98    | 0.99    | 0.92    | 0.85    | 0.80    | 0.76    | 0.74    | 0.73    | 0.74    | 0.81    | 0.87     | 0.87    | 0.87    |
|       | Legs     | <i>r</i> | -0.09   | -0.09   | -0.09   | -0.10   | -0.09   | -0.09   | -0.09   | -0.08   | -0.08   | -0.07   | -0.05   | -0.05   | -0.04   | -0.03   | -0.03   | -0.03   | -0.03   | -0.02   | -0.02    | -0.02   | -0.02   |
|       |          | <i>p</i> | 0.62    | 0.62    | 0.61    | 0.61    | 0.61    | 0.63    | 0.64    | 0.67    | 0.68    | 0.72    | 0.77    | 0.81    | 0.83    | 0.86    | 0.87    | 0.89    | 0.90    | 0.90    | 0.90     | 0.91    | 0.91    |
| Arms  | <i>r</i> | -0.13    | -0.13   | -0.13   | -0.13   | -0.12   | -0.12   | -0.11   | -0.11   | -0.11   | -0.10   | -0.09   | -0.09   | -0.09   | -0.09   | -0.09   | -0.08   | -0.08   | -0.08   | -0.08   | -0.07    | -0.07   |         |
|       | <i>p</i> | 0.49     | 0.49    | 0.50    | 0.50    | 0.51    | 0.52    | 0.53    | 0.55    | 0.56    | 0.58    | 0.61    | 0.62    | 0.63    | 0.64    | 0.65    | 0.65    | 0.65    | 0.67    | 0.68    | 0.68     | 0.69    |         |
| Δ BMC | Total    | <i>r</i> | 0.15    | 0.15    | 0.15    | 0.16    | 0.16    | 0.16    | 0.16    | 0.16    | 0.16    | 0.16    | 0.16    | 0.16    | 0.16    | 0.16    | 0.16    | 0.16    | 0.16    | 0.17    | 0.17     | 0.18    | 0.18    |
|       |          | <i>p</i> | 0.41    | 0.41    | 0.41    | 0.40    | 0.39    | 0.39    | 0.40    | 0.40    | 0.39    | 0.38    | 0.38    | 0.38    | 0.38    | 0.38    | 0.38    | 0.38    | 0.38    | 0.37    | 0.35     | 0.33    | 0.33    |
|       | Trunk    | <i>r</i> | 0.05    | 0.04    | 0.06    | 0.09    | 0.10    | 0.11    | 0.13    | 0.11    | 0.10    | 0.09    | 0.06    | 0.04    | 0.03    | 0.02    | 0.01    | -0.01   | 0.01    | 0.04    | 0.04     | 0.09    | 0.09    |
|       |          | <i>p</i> | 0.78    | 0.81    | 0.73    | 0.62    | 0.59    | 0.56    | 0.50    | 0.55    | 0.59    | 0.63    | 0.74    | 0.85    | 0.88    | 0.92    | 0.95    | 0.94    | 0.95    | 0.95    | 0.83     | 0.63    | 0.63    |
|       | Legs     | <i>r</i> | 0.42    | 0.41    | 0.41    | 0.41    | 0.41    | 0.41    | 0.41    | 0.41    | 0.41    | 0.41    | 0.41    | 0.41    | 0.41    | 0.42    | 0.42    | 0.42    | 0.42    | 0.42    | 0.42     | 0.42    | 0.42    |
|       |          | <i>p</i> | 0.02    | 0.02    | 0.02    | 0.02    | 0.02    | 0.02    | 0.02    | 0.02    | 0.02    | 0.02    | 0.02    | 0.02    | 0.02    | 0.02    | 0.02    | 0.02    | 0.02    | 0.02    | 0.02     | 0.02    | 0.02    |
| Arms  | <i>r</i> | -0.19    | -0.19   | -0.18   | -0.19   | -0.19   | -0.19   | -0.20   | -0.20   | -0.20   | -0.20   | -0.20   | -0.20   | -0.20   | -0.21   | -0.21   | -0.21   | -0.21   | -0.21   | -0.21   | -0.21    | -0.21   |         |
|       | <i>p</i> | 0.30     | 0.31    | 0.32    | 0.31    | 0.31    | 0.30    | 0.29    | 0.29    | 0.28    | 0.28    | 0.28    | 0.27    | 0.27    | 0.26    | 0.26    | 0.25    | 0.25    | 0.25    | 0.25    | 0.25     | 0.26    |         |

1Dual-energy x-ray absorptiometry (Lunar Prodigy, GE) variables are displayed in furthest left column, and multi-frequency bioelectrical impedance (mBCA 515/514, Seca) analysis frequencies are displayed in top row.

*Abbreviations.* BMC: bone mineral content; DXA: dual-energy x-ray absorptiometry; FM: fat mass; LST: lean soft tissue; ST: soft tissue (i.e. FM + LST)
