# Supplementary material for: Changes in total and segmental bioelectrical resistance are correlated with whole-body and segmental changes in lean soft tissue following a resistance training intervention
Source: PubMed Central journal article supplement (PMC6883592; doi:10.1186/s12970-019-0325-4), 2019-11-29
Supplement: 12970_2019_325_MOESM4_ESM.pdf [file 12970_2019_325_MOESM4_ESM.pdf]

**Supplemental Table 4.** Pearson correlations between changes in bioelectrical phase angle and changes in dual-energy x-ray absorptiometry body composition.<sup>1</sup>

|       |          | 1 kHz    | 1.5 kHz | 2 kHz | 3 kHz | 5 kHz | 7.5 kHz | 10 kHz | 15 kHz | 20 kHz | 30 kHz | 50 kHz | 75 kHz | 100 kHz | 150 kHz | 200 kHz | 300 kHz | 500 kHz | 750 kHz | 1000 kHz |       |
|-------|----------|----------|---------|-------|-------|-------|---------|--------|--------|--------|--------|--------|--------|---------|---------|---------|---------|---------|---------|----------|-------|
| Δ ST  | Total    | <i>r</i> | -0.25   | -0.27 | -0.27 | -0.28 | -0.30   | -0.32  | -0.35  | -0.37  | -0.39  | -0.41  | -0.43  | -0.43   | -0.42   | -0.40   | -0.35   | -0.26   | -0.10   | 0.00     | 0.07  |
|       |          | <i>p</i> | 0.18    | 0.15  | 0.14  | 0.12  | 0.10    | 0.08   | 0.05   | 0.04   | 0.03   | 0.02   | 0.02   | 0.02    | 0.02    | 0.03    | 0.06    | 0.17    | 0.58    | 0.98     | 0.69  |
|       | Trunk    | <i>r</i> | -0.05   | -0.03 | -0.04 | -0.05 | -0.08   | -0.09  | -0.12  | -0.12  | -0.12  | -0.11  | -0.08  | 0.01    | 0.02    | 0.03    | -0.01   | 0.36    | -0.11   | -0.13    | -0.14 |
|       |          | <i>p</i> | 0.80    | 0.87  | 0.83  | 0.81  | 0.65    | 0.62   | 0.52   | 0.53   | 0.52   | 0.56   | 0.66   | 0.96    | 0.90    | 0.86    | 0.96    | 0.04    | 0.57    | 0.48     | 0.46  |
|       | Legs     | <i>r</i> | 0.01    | -0.01 | -0.02 | -0.05 | -0.09   | -0.12  | -0.14  | -0.18  | -0.20  | -0.23  | -0.28  | -0.31   | -0.34   | -0.37   | -0.40   | -0.42   | -0.44   | -0.43    | -0.43 |
|       |          | <i>p</i> | 0.95    | 0.98  | 0.91  | 0.81  | 0.65    | 0.52   | 0.45   | 0.35   | 0.29   | 0.21   | 0.13   | 0.09    | 0.06    | 0.04    | 0.03    | 0.02    | 0.01    | 0.01     | 0.02  |
| Arms  | <i>r</i> | -0.27    | -0.28   | -0.28 | -0.29 | -0.32 | -0.34   | -0.35  | -0.36  | -0.37  | -0.36  | -0.34  | -0.32  | -0.32   | -0.35   | -0.40   | -0.47   | -0.58   | -0.62   | -0.62    |       |
|       | <i>p</i> | 0.15     | 0.13    | 0.13  | 0.11  | 0.08  | 0.06    | 0.05   | 0.04   | 0.04   | 0.05   | 0.06   | 0.08   | 0.08    | 0.05    | 0.03    | 0.01    | 0.00    | 0.00    | 0.00     |       |
| Δ LST | Total    | <i>r</i> | -0.23   | -0.18 | -0.14 | -0.13 | -0.14   | -0.17  | -0.22  | -0.26  | -0.29  | -0.31  | -0.34  | -0.34   | -0.32   | -0.28   | -0.22   | -0.13   | -0.02   | 0.05     | 0.06  |
|       |          | <i>p</i> | 0.21    | 0.34  | 0.44  | 0.50  | 0.46    | 0.37   | 0.23   | 0.16   | 0.12   | 0.09   | 0.06   | 0.06    | 0.08    | 0.13    | 0.23    | 0.50    | 0.93    | 0.77     | 0.76  |
|       | Trunk    | <i>r</i> | -0.07   | -0.08 | -0.08 | -0.04 | -0.05   | -0.07  | -0.13  | -0.19  | -0.21  | -0.22  | -0.13  | -0.08   | -0.04   | -0.03   | -0.12   | 0.30    | 0.04    | -0.20    | -0.16 |
|       |          | <i>p</i> | 0.72    | 0.68  | 0.69  | 0.83  | 0.78    | 0.69   | 0.47   | 0.31   | 0.25   | 0.22   | 0.49   | 0.68    | 0.81    | 0.86    | 0.52    | 0.11    | 0.83    | 0.29     | 0.39  |
|       | Legs     | <i>r</i> | 0.02    | 0.02  | 0.01  | 0.00  | -0.03   | -0.06  | -0.08  | -0.11  | -0.13  | -0.16  | -0.19  | -0.22   | -0.24   | -0.28   | -0.31   | -0.36   | -0.41   | -0.43    | -0.44 |
|       |          | <i>p</i> | 0.93    | 0.92  | 0.95  | 0.99  | 0.86    | 0.74   | 0.66   | 0.55   | 0.48   | 0.39   | 0.29   | 0.23    | 0.19    | 0.13    | 0.09    | 0.05    | 0.02    | 0.02     | 0.01  |
| Arms  | <i>r</i> | -0.18    | -0.17   | -0.17 | -0.18 | -0.22 | -0.25   | -0.27  | -0.28  | -0.28  | -0.27  | -0.25  | -0.25  | -0.25   | -0.31   | -0.37   | -0.48   | -0.61   | -0.66   | -0.67    |       |
|       | <i>p</i> | 0.34     | 0.37    | 0.37  | 0.33  | 0.24  | 0.17    | 0.14   | 0.12   | 0.12   | 0.13   | 0.17   | 0.18   | 0.17    | 0.09    | 0.04    | 0.01    | 0.00    | 0.00    | 0.00     |       |
| Δ FM  | Total    | <i>r</i> | -0.04   | -0.11 | -0.15 | -0.19 | -0.21   | -0.21  | -0.20  | -0.20  | -0.20  | -0.20  | -0.21  | -0.21   | -0.22   | -0.22   | -0.22   | -0.19   | -0.10   | -0.03    | 0.05  |
|       |          | <i>p</i> | 0.84    | 0.55  | 0.42  | 0.32  | 0.27    | 0.25   | 0.27   | 0.27   | 0.27   | 0.28   | 0.27   | 0.26    | 0.24    | 0.23    | 0.24    | 0.32    | 0.61    | 0.89     | 0.77  |
|       | Trunk    | <i>r</i> | 0.03    | 0.05  | 0.05  | 0.05  | 0.05    | 0.07   | 0.07   | 0.10   | 0.11   | 0.11   | 0.07   | 0.10    | 0.07    | 0.06    | 0.08    | 0.12    | -0.10   | 0.06     | 0.02  |
|       |          | <i>p</i> | 0.88    | 0.78  | 0.79  | 0.81  | 0.81    | 0.72   | 0.72   | 0.60   | 0.55   | 0.55   | 0.70   | 0.61    | 0.69    | 0.74    | 0.68    | 0.52    | 0.59    | 0.74     | 0.90  |
|       | Legs     | <i>r</i> | -0.04   | -0.08 | -0.10 | -0.13 | -0.16   | -0.17  | -0.18  | -0.20  | -0.21  | -0.22  | -0.26  | -0.28   | -0.29   | -0.30   | -0.29   | -0.26   | -0.20   | -0.15    | -0.13 |
|       |          | <i>p</i> | 0.83    | 0.68  | 0.60  | 0.48  | 0.39    | 0.35   | 0.33   | 0.29   | 0.27   | 0.22   | 0.17   | 0.13    | 0.11    | 0.10    | 0.11    | 0.16    | 0.28    | 0.41     | 0.47  |
| Arms  | <i>r</i> | -0.21    | -0.23   | -0.22 | -0.22 | -0.22 | -0.23   | -0.23  | -0.24  | -0.25  | -0.25  | -0.25  | -0.24  | -0.24   | -0.22   | -0.22   | -0.21   | -0.19   | -0.16   | -0.13    |       |
|       | <i>p</i> | 0.25     | 0.22    | 0.23  | 0.24  | 0.23  | 0.22    | 0.21   | 0.20   | 0.18   | 0.17   | 0.17   | 0.19   | 0.20    | 0.23    | 0.24    | 0.27    | 0.32    | 0.38    | 0.48     |       |
| Δ BMC | Total    | <i>r</i> | -0.03   | -0.04 | -0.04 | -0.03 | -0.02   | -0.01  | 0.01   | 0.02   | 0.03   | 0.04   | 0.05   | 0.05    | 0.03    | -0.01   | -0.05   | -0.10   | -0.12   | -0.10    | -0.05 |
|       |          | <i>p</i> | 0.85    | 0.83  | 0.84  | 0.87  | 0.91    | 0.97   | 0.96   | 0.91   | 0.87   | 0.83   | 0.79   | 0.81    | 0.86    | 0.96    | 0.79    | 0.61    | 0.53    | 0.61     | 0.81  |
|       | Trunk    | <i>r</i> | 0.06    | 0.05  | 0.06  | 0.04  | 0.06    | 0.08   | 0.15   | 0.17   | 0.18   | 0.22   | 0.11   | 0.12    | 0.08    | 0.08    | 0.18    | -0.06   | -0.01   | 0.32     | 0.27  |
|       |          | <i>p</i> | 0.73    | 0.79  | 0.77  | 0.81  | 0.76    | 0.66   | 0.43   | 0.35   | 0.33   | 0.25   | 0.54   | 0.54    | 0.65    | 0.68    | 0.34    | 0.75    | 0.97    | 0.08     | 0.14  |
|       | Legs     | <i>r</i> | 0.33    | 0.34  | 0.34  | 0.34  | 0.33    | 0.33   | 0.33   | 0.33   | 0.32   | 0.31   | 0.29   | 0.27    | 0.26    | 0.25    | 0.26    | 0.28    | 0.32    | 0.35     | 0.37  |
|       |          | <i>p</i> | 0.07    | 0.06  | 0.06  | 0.07  | 0.07    | 0.07   | 0.07   | 0.07   | 0.08   | 0.09   | 0.12   | 0.14    | 0.16    | 0.17    | 0.16    | 0.13    | 0.08    | 0.05     | 0.04  |
| Arms  | <i>r</i> | -0.30    | -0.25   | -0.20 | -0.15 | -0.11 | -0.09   | -0.09  | -0.11  | -0.12  | -0.13  | -0.14  | -0.13  | -0.12   | -0.11   | -0.11   | -0.14   | -0.21   | -0.27   | -0.29    |       |
|       | <i>p</i> | 0.11     | 0.18    | 0.28  | 0.43  | 0.57  | 0.62    | 0.61   | 0.57   | 0.53   | 0.48   | 0.46   | 0.47   | 0.53    | 0.55    | 0.54    | 0.47    | 0.25    | 0.14    | 0.11     |       |

<sup>1</sup>Dual-energy x-ray absorptiometry (Lunar Prodigy, GE) variables are displayed in furthest left column, and multi-frequency bioelectrical impedance (mBCA 515/514, Seca) analysis frequencies are displayed in top row.

*Abbreviations.* BMC: bone mineral content; DXA: dual-energy x-ray absorptiometry; FM: fat mass; LST: lean soft tissue; ST: soft tissue (i.e. FM + LST)
