# Supplementary material for: Changes in total and segmental bioelectrical resistance are correlated with whole-body and segmental changes in lean soft tissue following a resistance training intervention
Source: Springer Nature journal article supplement (doi:10.1186/s12970-019-0325-4), 2019-01-15
Supplement: MOESM3 [file 17451528]

**Supplemental Table 3.** Pearson correlations between changes in bioelectrical reactance and changes in dual-energy x-ray absorptiometry body composition.<sup>1</sup>

|       |       |       | 1 kHz | 1.5 kHz | 2 kHz | 3 kHz | 5 kHz | 7.5 kHz | 10 kHz | 15 kHz | 20 kHz | 30 kHz | 50 kHz | 75 kHz | 100 kHz | 150 kHz | 200 kHz | 300 kHz | 500 kHz | 750 kHz | 1000 kHz |      |  |  |
|-------|-------|-------|-------|---------|-------|-------|-------|---------|--------|--------|--------|--------|--------|--------|---------|---------|---------|---------|---------|---------|----------|------|--|--|
| Δ ST  | Total | r     | -0.38 | -0.40   | -0.41 | -0.42 | -0.43 | -0.44   | -0.46  | -0.48  | -0.50  | -0.51  | -0.54  | -0.55  | -0.55   | -0.54   | -0.49   | -0.33   | -0.14   | 0.00    |          |      |  |  |
|       |       | p     | 0.04  | 0.03    | 0.02  | 0.02  | 0.02  | 0.01    | 0.009  | 0.006  | 0.005  | 0.003  | 0.002  | 0.001  | 0.001   | 0.001   | 0.002   | 0.005   | 0.070   | 0.45    | 0.99     |      |  |  |
|       | Trunk | r     | -0.13 | -0.13   | -0.15 | -0.17 | -0.22 | -0.25   | -0.29  | -0.31  | -0.33  | -0.33  | -0.33  | -0.22  | -0.17   | -0.07   | -0.03   | 0.36    | -0.13   | -0.18   | -0.20    |      |  |  |
|       |       | p     | 0.48  | 0.48    | 0.43  | 0.37  | 0.23  | 0.18    | 0.11   | 0.09   | 0.07   | 0.07   | 0.07   | 0.23   | 0.36    | 0.71    | 0.87    | 0.05    | 0.50    | 0.34    | 0.28     |      |  |  |
|       | Legs  | r     | -0.15 | -0.16   | -0.17 | -0.19 | -0.21 | -0.23   | -0.25  | -0.28  | -0.30  | -0.32  | -0.36  | -0.38  | -0.39   | -0.40   | -0.41   | -0.42   | -0.42   | -0.42   | -0.42    |      |  |  |
|       |       | p     | 0.43  | 0.38    | 0.36  | 0.32  | 0.26  | 0.21    | 0.17   | 0.13   | 0.10   | 0.08   | 0.05   | 0.04   | 0.03    | 0.02    | 0.02    | 0.02    | 0.02    | 0.02    | 0.02     |      |  |  |
| Arms  | r     | -0.45 | -0.46 | -0.47   | -0.48 | -0.49 | -0.50 | -0.51   | -0.52  | -0.52  | -0.53  | -0.53  | -0.54  | -0.54  | -0.55   | -0.56   | -0.58   | -0.61   | -0.62   | -0.62   |          |      |  |  |
|       | p     | 0.01  | 0.009 | 0.008   | 0.007 | 0.005 | 0.004 | 0.003   | 0.003  | 0.002  | 0.002  | 0.002  | 0.002  | 0.002  | 0.001   | 0.001   | 0.001   | 0.0006  | 0.0003  | 0.0002  | 0.0002   |      |  |  |
| Δ LST | Total | r     | -0.41 | -0.38   | -0.36 | -0.35 | -0.36 | -0.39   | -0.42  | -0.46  | -0.48  | -0.52  | -0.56  | -0.58  | -0.59   | -0.58   | -0.56   | -0.50   | -0.32   | -0.13   | -0.04    |      |  |  |
|       |       | p     | 0.02  | 0.03    | 0.05  | 0.05  | 0.04  | 0.03    | 0.02   | 0.01   | 0.006  | 0.003  | 0.001  | 0.001  | 0.001   | 0.001   | 0.001   | 0.005   | 0.08    | 0.47    | 0.82     |      |  |  |
|       | Trunk | r     | -0.17 | -0.19   | -0.20 | -0.20 | -0.24 | -0.28   | -0.38  | -0.45  | -0.49  | -0.52  | -0.46  | -0.37  | -0.29   | -0.16   | -0.15   | 0.29    | 0.01    | -0.29   | -0.29    |      |  |  |
|       |       | p     | 0.36  | 0.31    | 0.27  | 0.28  | 0.19  | 0.13    | 0.04   | 0.01   | 0.005  | 0.003  | 0.009  | 0.04   | 0.11    | 0.38    | 0.43    | 0.12    | 0.96    | 0.12    | 0.12     |      |  |  |
|       | Legs  | r     | -0.16 | -0.16   | -0.16 | -0.17 | -0.19 | -0.21   | -0.23  | -0.25  | -0.27  | -0.30  | -0.34  | -0.36  | -0.38   | -0.40   | -0.41   | -0.42   | -0.44   | -0.45   | -0.45    |      |  |  |
|       |       | p     | 0.39  | 0.39    | 0.38  | 0.37  | 0.31  | 0.26    | 0.22   | 0.17   | 0.14   | 0.10   | 0.06   | 0.04   | 0.04    | 0.03    | 0.02    | 0.02    | 0.01    | 0.01    | 0.01     |      |  |  |
| Arms  | r     | -0.40 | -0.41 | -0.41   | -0.43 | -0.45 | -0.47 | -0.49   | -0.51  | -0.52  | -0.53  | -0.54  | -0.55  | -0.56  | -0.59   | -0.61   | -0.64   | -0.67   | -0.69   | -0.69   |          |      |  |  |
|       | p     | 0.03  | 0.02  | 0.02    | 0.01  | 0.007 | 0.005 | 0.004   | 0.003  | 0.002  | 0.002  | 0.001  | 0.001  | 0.001  | 0.0005  | 0.0003  | 0.0001  | <0.0001 | <0.0001 | <0.0001 |          |      |  |  |
| Δ FM  | Total | r     | -0.05 | -0.10   | -0.13 | -0.15 | -0.16 | -0.17   | -0.16  | -0.16  | -0.15  | -0.14  | -0.14  | -0.13  | -0.13   | -0.13   | -0.14   | -0.13   | -0.09   | -0.03   | 0.06     |      |  |  |
|       |       | p     | 0.78  | 0.58    | 0.49  | 0.42  | 0.38  | 0.37    | 0.39   | 0.40   | 0.42   | 0.44   | 0.47   | 0.48   | 0.47    | 0.47    | 0.47    | 0.47    | 0.63    | 0.88    | 0.77     |      |  |  |
|       | Trunk | r     | 0.02  | 0.04    | 0.04  | 0.04  | 0.04  | 0.06    | 0.07   | 0.09   | 0.09   | 0.09   | 0.06   | 0.07   | 0.06    | 0.05    | 0.08    | 0.12    | -0.10   | 0.08    | 0.05     |      |  |  |
|       |       | p     | 0.91  | 0.84    | 0.83  | 0.83  | 0.84  | 0.76    | 0.72   | 0.64   | 0.62   | 0.63   | 0.76   | 0.69   | 0.76    | 0.78    | 0.69    | 0.52    | 0.61    | 0.68    | 0.80     |      |  |  |
|       | Legs  | r     | -0.07 | -0.09   | -0.10 | -0.13 | -0.14 | -0.15   | -0.16  | -0.16  | -0.16  | -0.17  | -0.17  | -0.17  | -0.17   | -0.16   | -0.16   | -0.14   | -0.12   | -0.11   | -0.10    |      |  |  |
|       |       | p     | 0.72  | 0.63    | 0.58  | 0.50  | 0.44  | 0.42    | 0.40   | 0.38   | 0.38   | 0.37   | 0.36   | 0.36   | 0.37    | 0.38    | 0.40    | 0.45    | 0.52    | 0.57    | 0.59     |      |  |  |
| Arms  | r     | -0.22 | -0.22 | -0.22   | -0.21 | -0.20 | -0.20 | -0.20   | -0.20  | -0.20  | -0.20  | -0.19  | -0.18  | -0.17  | -0.16   | -0.15   | -0.14   | -0.13   | -0.12   | -0.11   |          |      |  |  |
|       | p     | 0.23  | 0.23  | 0.24    | 0.26  | 0.27  | 0.28  | 0.28    | 0.28   | 0.28   | 0.28   | 0.30   | 0.34   | 0.36   | 0.40    | 0.42    | 0.45    | 0.47    | 0.51    | 0.56    |          |      |  |  |
| Δ BMC | Total | r     | 0.03  | 0.04    | 0.04  | 0.05  | 0.06  | 0.07    | 0.08   | 0.09   | 0.09   | 0.10   | 0.12   | 0.12   | 0.12    | 0.10    | 0.08    | 0.04    | -0.03   | -0.05   | -0.02    |      |  |  |
|       |       | p     | 0.85  | 0.84    | 0.82  | 0.80  | 0.76  | 0.72    | 0.68   | 0.65   | 0.61   | 0.57   | 0.53   | 0.53   | 0.53    | 0.60    | 0.68    | 0.85    | 0.89    | 0.80    | 0.91     |      |  |  |
|       | Trunk | r     | 0.07  | 0.05    | 0.06  | 0.06  | 0.07  | 0.10    | 0.17   | 0.19   | 0.19   | 0.21   | 0.13   | 0.12   | 0.09    | 0.08    | 0.18    | -0.06   | -0.01   | 0.33    | 0.28     |      |  |  |
|       |       | p     | 0.71  | 0.77    | 0.73  | 0.75  | 0.69  | 0.59    | 0.36   | 0.32   | 0.31   | 0.25   | 0.49   | 0.51   | 0.62    | 0.66    | 0.33    | 0.76    | 0.97    | 0.07    | 0.13     |      |  |  |
|       | Legs  | r     | 0.38  | 0.38    | 0.38  | 0.38  | 0.37  | 0.38    | 0.38   | 0.37   | 0.37   | 0.37   | 0.37   | 0.36   | 0.36    | 0.36    | 0.36    | 0.36    | 0.37    | 0.37    | 0.38     | 0.39 |  |  |
|       |       | p     | 0.03  | 0.03    | 0.03  | 0.04  | 0.04  | 0.04    | 0.04   | 0.04   | 0.04   | 0.04   | 0.04   | 0.04   | 0.04    | 0.05    | 0.04    | 0.04    | 0.04    | 0.03    | 0.03     |      |  |  |
| Arms  | r     | -0.32 | -0.27 | -0.23   | -0.19 | -0.16 | -0.15 | -0.16   | -0.17  | -0.17  | -0.19  | -0.19  | -0.19  | -0.19  | -0.19   | -0.19   | -0.19   | -0.19   | -0.22   | -0.25   | -0.26    |      |  |  |
|       | p     | 0.08  | 0.14  | 0.21    | 0.30  | 0.38  | 0.41  | 0.40    | 0.37   | 0.35   | 0.31   | 0.30   | 0.30   | 0.31   | 0.32    | 0.32    | 0.30    | 0.23    | 0.17    | 0.15    |          |      |  |  |

<sup>1</sup>Dual-energy x-ray absorptiometry (Lunar Prodigy, GE) variables are displayed in furthest left column, and multi-frequency bioelectrical impedance (mBCA 515/514, Seca) analysis frequencies are displayed in top row.

*Abbreviations.* BMC: bone mineral content; DXA: dual-energy x-ray absorptiometry; FM: fat mass; LST: lean soft tissue; ST: soft tissue (i.e. FM + LST)
